# Supplementary material
Source: PubMed Central journal article supplement (PMC1458913)

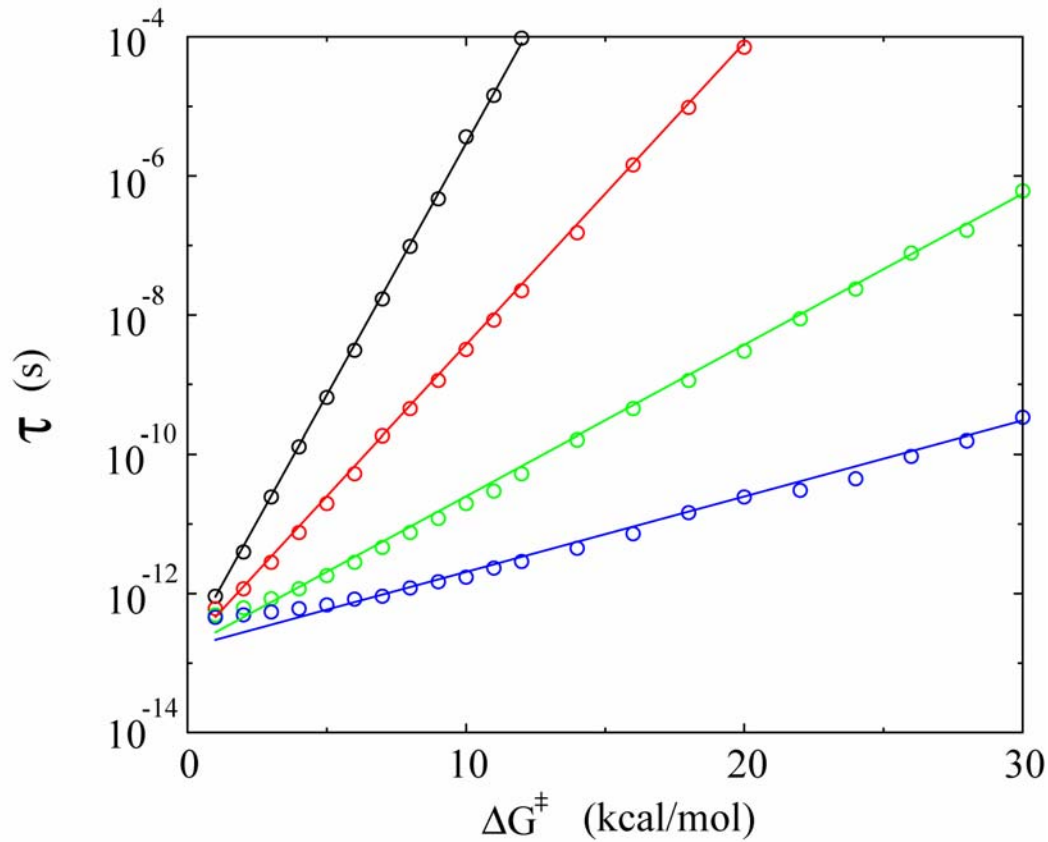

Supplement: pnas_0510860103_1.pdf [file pnas_0510860103_1.pdf]
